# Supplementary material for: Food Services Using Energy- and Protein-Fortified Meals to Assist Vulnerable Community-Residing Older Adults Meet Their Dietary Requirements and Maintain Good Health and Quality of Life: Findings from a Pilot Study
Source: MDPI journal article supplement (doi:10.3390/geriatrics3030060), 2018-09-12
Supplement: s1 [file s1]

**Supplementary Table S1.** MOW Screening Questions.

| No. | Questions                                      | YES | NO |
|-----|------------------------------------------------|-----|----|
| 1.  | Obviously underweight/frail                    |     |    |
| 2.  | Unintentional weight loss                      |     |    |
| 3.  | Reduced appetite (food and fluid intake)       |     |    |
| 4.  | Mouth or teeth swallowing problems             |     |    |
| 5.  | Following special diet                         |     |    |
| 6.  | Unable to shop for food                        |     |    |
| 7.  | Unable to prepare other meals                  |     |    |
| 8.  | Unable to feed self                            |     |    |
| 9.  | Obviously overweight affecting quality of life |     |    |
| 10. | Unintentional weight gain                      |     |    |

**Supplementary Table S2.** Baseline characteristics of participants according to group allocation <sup>^</sup> #.

| Characteristics                                                   | STD<br>( <i>n</i> = 16) | HEHP<br>( <i>n</i> = 14) | Control<br>( <i>n</i> = 11) | Total<br>( <i>n</i> = 41) |
|-------------------------------------------------------------------|-------------------------|--------------------------|-----------------------------|---------------------------|
| Gender:                                                           |                         |                          |                             |                           |
| Male/Female ( <i>n</i> )                                          | 8/8                     | 6/8                      | 5/6                         | 19/22                     |
| Age (year)                                                        | 85.6 ± 1.7              | 83.8 ± 1.4               | 81.5 ± 1.6                  | 83.9 ± 0.9                |
| Height (m)                                                        | 1.63 ± 0.1              | 1.62 ± 0.09              | 1.64 ± 0.06                 | 1.63 ± 0.09               |
| Body weight (kg)                                                  | 58.9 ± 2.9              | 57.4 ± 3.0               | 57.6 ± 2.0                  | 58.0 ± 1.6                |
| BMI (kg/m <sup>2</sup> )                                          | 22.2 ± 0.8              | 21.9 ± 1.3               | 21.4 ± 0.7                  | 21.9 ± 0.6                |
| Self-reported weight loss percentage in the previous three months | 3.8 ± 1.4               | 5.9 ± 1.9                | 2.1 ± 1.9                   | 4.0 ± 1.0                 |
| Number of medications                                             | 7.1 ± 0.8               | 6.1 ± 1.1                | 8.6 ± 1.2                   | 7.1 ± 0.6                 |
| Nutritional supplements (Multivitamins / minerals)                | 2.0 ± 0.7               | 2.0 ± 0.5                | 2.0 ± 0.5                   | 2.0 ± 0.3                 |
| Number of meals ordered from MOW                                  | 5.3 ± 0.3               | 5.0 ± 0.7                | N/A                         | 5.0 ± 0.2                 |
| Number of unmet needs based on MOW assessment                     | 3.8 ± 0.3               | 3.6 ± 0.3                | N/A                         | 3.7 ± 0.2                 |
| Living status ( <i>n</i> ):                                       |                         |                          |                             |                           |
| 1. Alone                                                          | 9                       | 12                       | 5                           | 26                        |
| 2. With significant other                                         | 7                       | 2                        | 6                           | 15                        |
| Oral nutrition support ( <i>n</i> )                               |                         |                          |                             |                           |
| 1. Yes                                                            | 5                       | 7                        | 2                           | 14                        |
| 2. No                                                             | 11                      | 7                        | 9                           | 27                        |
| MOW referral source ( <i>n</i> )                                  |                         |                          |                             |                           |
| 1. Self                                                           | 3                       | 2                        | N/A                         | 17                        |
| 2. Health professional                                            | 3                       | 3                        |                             | 20                        |
| 3. Family                                                         | 4                       | 4                        |                             | 27                        |
| 4. Hospital                                                       | 4                       | 3                        |                             | 23                        |
| 5. Doctor                                                         | 2                       | 2                        |                             | 13                        |
| 6. Friends                                                        | 0                       | 0                        |                             | 0                         |
| 7. Others                                                         | 0                       | 0                        |                             | 0                         |

<sup>^</sup> One-way ANOVA was used to compare differences in baseline characteristics between the three groups and completers against dropouts; # data presented as: mean ± SEM; N/A: not applicable.
